# Supplementary material
Source: PubMed Central journal article supplement (PMC3962243)

## SUPPLEMENTARY DATA

Fig. S1. Pistils of *Brassica campestris* ssp. *chinensis* genic male sterile line system ('*Bcajh97-01A/B*') hybridized with a *BcMF8* sense probe. (A–D) Longitudinal-sections of the pollinated pistils at 1, 3, 10 and 24 HAP hybridized with a *BcMF8* sense probe. (E–H) Longitudinal-sections of the un-pollinated pistils at 1, 3, 10 and 24 HAP hybridized with a *BcMF8* sense probe. No hybridization signal was detected in pollinated or un-pollinated pistils at 1 HAP (A and E), 3 HAP (B and F), 10 HAP (C and G), and 24 HAP (D and H). Scale bars 500  $\mu$ m.

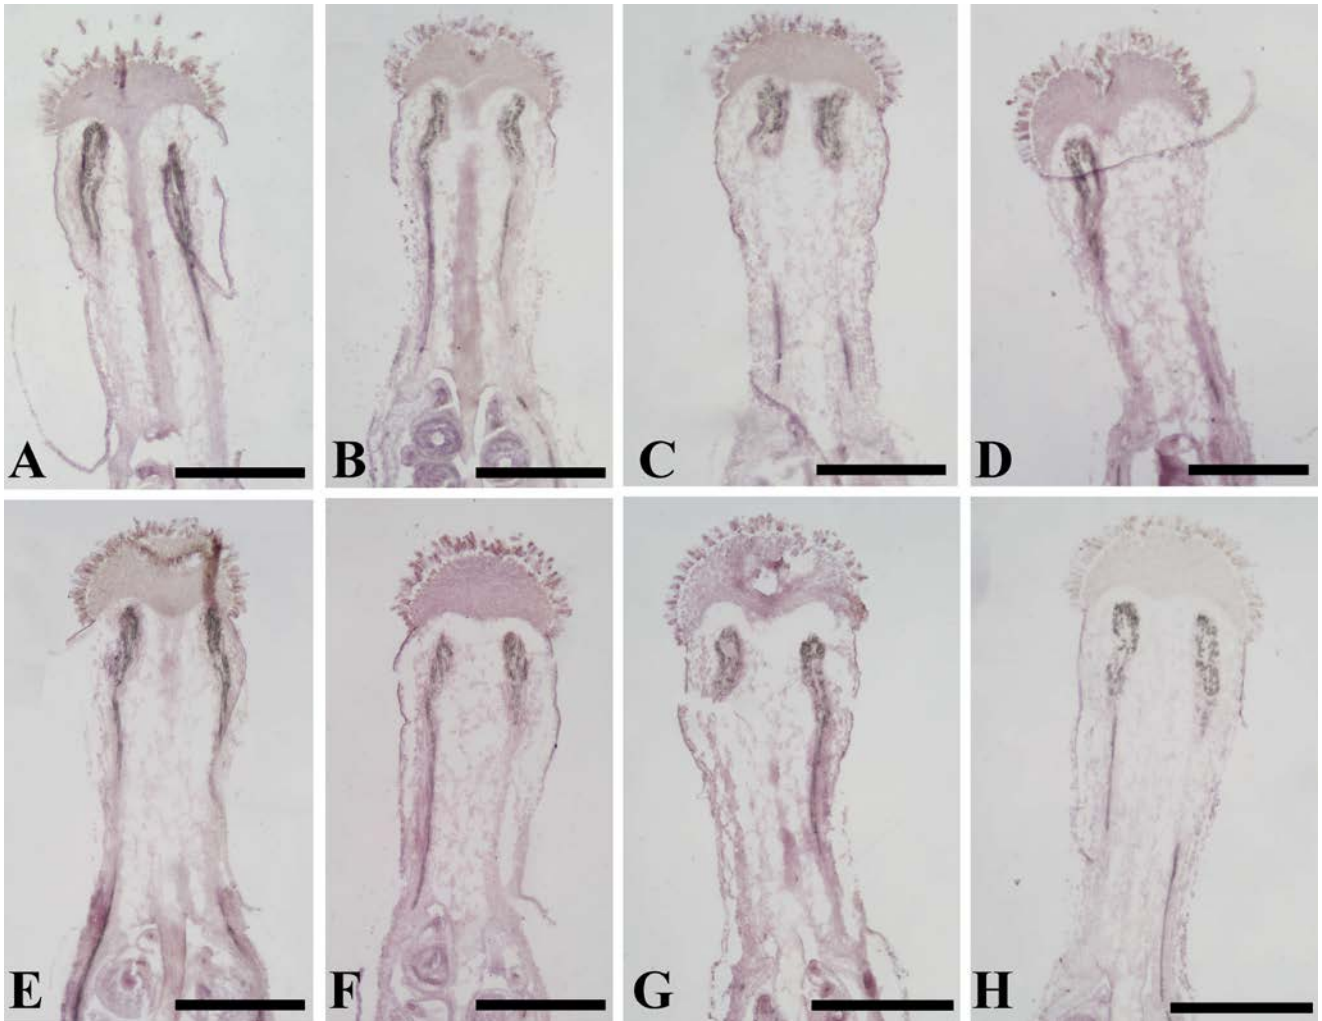

Fig. S2. Construction of the expression vector pBI35S::BcMF8A

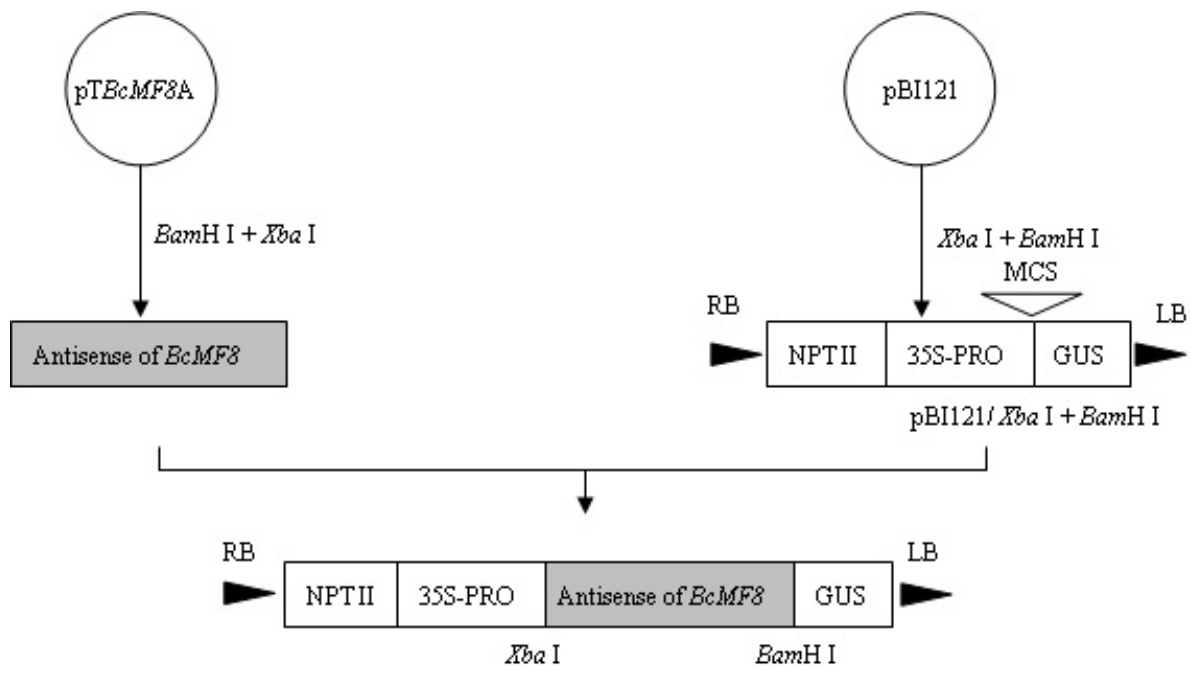

Fig. S3. Detection of the marker gene *NPTII* in the *bcmf8* lines by PCR amplification. A 444-bp expected band was amplified in eight *bcmf8* lines, the empty vector pBI121-transformed plants (CK), as well as the positive control vector pBI121. No band was amplified in wild-type (WT) *Brassica campestris* ssp. *chinensis*.

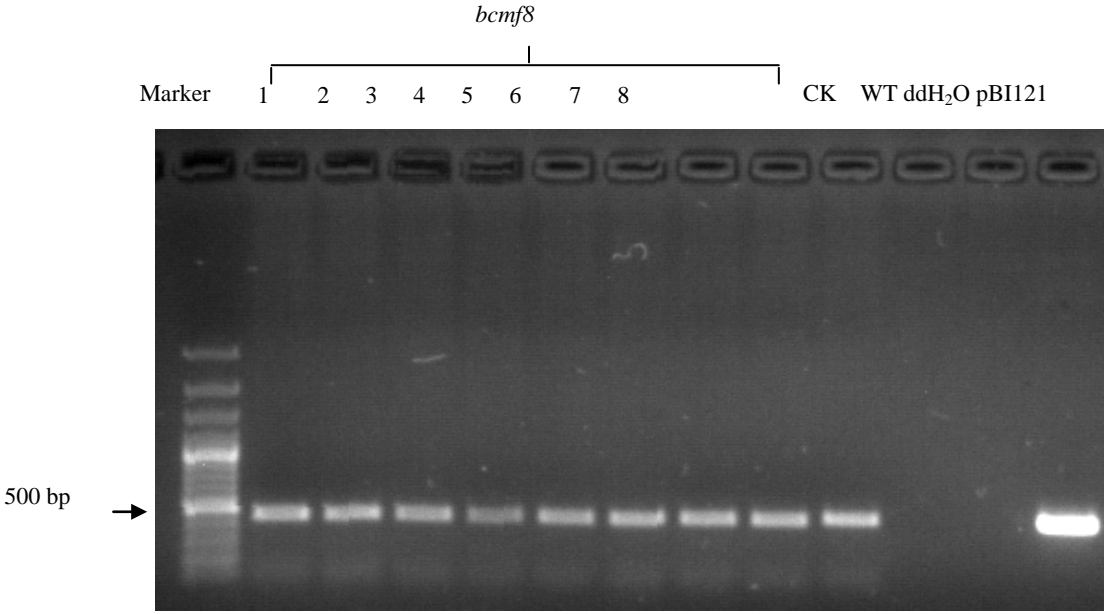

Fig. S4. Detection of the marker gene *NPTII* in the *bcmf8* lines by Southern blot. Two duplications of *NPTII* in eight *bcmf8* lines and empty vector pBI121-transformed plants (CK) were detected. No hybridization signal was detected in wild-type (WT) *Brassica campestris* ssp. *chinensis*.

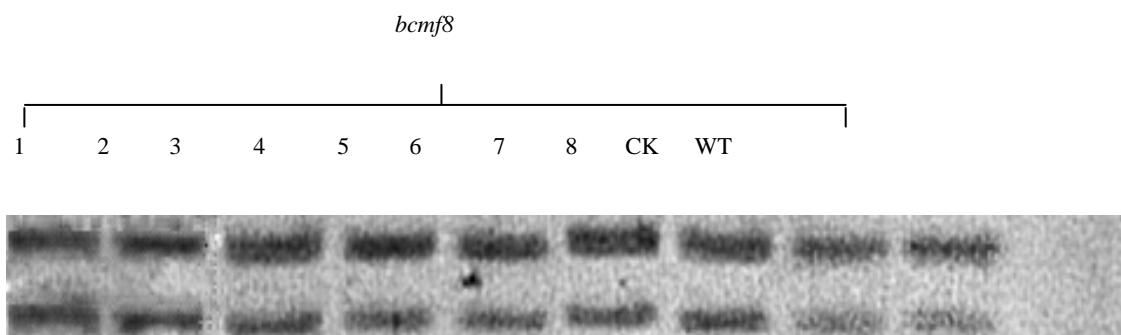

Supplement: supp_mct315_mct315supp.pdf [file supp_mct315_mct315supp.pdf]
